# Supplementary material
Source: publisher figshare collection journal article supplement (https://tandf.figshare.com/ndownloader/files/20049446)
Supplement: Supplementary file 1 [file 20049446]

**Supplement**

**Table A - L****ist Of Countries Included In The Review Based On The World Bank Classification Of Economies (1)**

| **Low- and middle-income countries** | **High income countries** |
| --- | --- |
| Albania | Australia |
| Azerbaijan | Denmark |
| Bangladesh | France |
| Bosnia and Herzegovina (including Republic of Srpska) | Germany |
| Botswana | Iceland |
| Brazil | Kuwait |
| Bulgaria | Netherlands |
| China | New Zealand |
| Ethiopia | Norway |
| Ghana | Qatar |
| India | Singapore |
| Iraq | Slovenia |
| Jordan | Spain |
| Kenya | Sweden |
| Kosovo | Taiwan |
| Lebanon | United Kingdom |
| Malawi | United States of America |
| Malaysia |  |
| Mexico |  |
| Mongolia |  |
| Namibia |  |
| Nigeria |  |
| Pakistan |  |
| Poland |  |
| South Africa |  |
| Sri Lanka |  |
| Swaziland |  |
| Syria |  |
| Thailand |  |
| Vietnam |  |
| Zambia |  |
| Zimbabwe |  |

**Table B: Epidemiology of URTIs across Countries.**

| **Country** | **Epidemiology** |
| --- | --- |
| **High income countries** |  |
| Australia | Respiratory tract infections were the most common reason for patients to visit their general practitioner (GP) (2, 3). |
| UK | Most people in the UK will develop an acute respiratory tract infection every year, with these infections seen as the commonest acute problem dealt with in primary care (4) |
| USA | - There were an estimated 14.4 million ambulatory care visits among all ages for inﬂuenza between 1997 and 2001 (5) - Overall, approximately 25 million cases of URTIs are managed annually by family physicians in the US, resulting in approximately 20-22 million days of absence from work or school each year (6) |
| **Lower- and Middle-income countries** |  |
| Botswana | Excluding neonatal conditions, unspecified acute respiratory infections accounted for 3.5% of the outpatient childhood morbidity in 2010 (7). |
| Ethiopia | Results from the 2011 Ethiopian Demographic and Health Survey conducted among 11,645 children under five years of age and their mothers showed a prevalence rate of 7% for ARIs (8) |
| Ghana | The annual age-dependent incidence for URTIs varied from 7.9% to 8.3% between 1995 and 2000 (9). |
| Greenland | Among the Sisimiut population, the incidence of URTIs was 1.6 episodes per 100 days at risk in this population <2 years old (10). |
| India | - Among 3498 urban and rural patients, 8.2% had an URTI (11) - In another study in India among children from the urban slums in Gulbarga city, acute respiratory infections were seen among 27.25% of children with URTIs predominating (12) - In a separate study among children aged 0 to 10 in a rural north Indian community, the incidence of ARI was 5.9 (5.8-6.0) per child-year with minimal gender differences (13) - In one Indian hospital, 20-40% of outpatient visits and 12-35% of inpatients were because of an URTI, with most of these infections due to respiratory viruses (14, 15) |
| Malaysia | Out of a total of 123,524 prescriptions analysed in patients attending ambulatory care clinics in Malaysia, 5.8% ofpatients were diagnosed with an URTI (16). |
| Malawi | Among infants below 5 years of age, the yearly frequency of acute respiratory infections including URTIs was 32.6%,with a point prevalence of 8.3% (17). |
| Nigeria | Results from the 2013 Nigerian National Demographic and Health Survey revealed that 2% of children had symptoms suggestive of acute respiratory tract infections around whilst 13% of children had fever which is a major sign of an ARI (18) |
| Vietnam | The number of new cases for ARI among children was 623 per 100,000 inhabitants in 2008 (19). |

NB: ARI = Acute respiratory tract infection; URTI = Upper respiratory tract infection

**Table C: Physician prescribing Practices for Patients with Respiratory Tract Infections across among high income countries**

| **Country** | **Antibiotic utilization** |
| --- | --- |
| Australia | - In a survey conducted in 2014, 56.5% of general practitioners stated they would very often, often or sometimes prescribe an antibiotic for an URTI to meet patient expectations (3) - In a study published in 2016, 47% of patients diagnosed with an acute URTI were prescribed an antibiotic. This was despite guidelines indicating an acceptable range of between 0% - 20% for prescribing an antibiotic (20) |
| Denmark | Antibiotics prescribed were for URTIs in approximately 20% of encounters in ambulatory care (21). |
| European Union | Over 50% of patients presenting in ambulatory care with an acute cough among EU countries are currently prescribed antibiotics (range from just over 20% to 80%) whereas the appropriate figure should be only 10% (22-24). |
| Germany | Antibiotics were prescribed in 41% of consultations in ambulatory care for acute lower respiratory tract infections (25, 26). |
| Italy | - Antibiotics were prescribed in 67.3% of the consultations between physicians in local health units in Southern Italy and patients with acute respiratory tract infections (pharyngitis, bronchitis, influenza, and sinusitis) - Macrolides were the most frequently prescribed antibiotics followed by amoxicillin with clavulanic acid and the fluoroquinolones (27). |
| Netherlands | 27% to 29% of patients visiting their family doctor were prescribed antibiotics for their acute respiratory tract infections (28). |
| Norway | 27% of patients visiting their family doctor were prescribed antibiotics for their acute respiratory tract infections (29). |
| Taiwan | In children younger than 18, only 7% of patients received an antibiotic for a URTI between 2000 and 2009 (30), with an overall reduction in the prescribing of antibiotics for acute tonsillitis in children following greater awareness of likely causes (31). |
| UK | An appreciable number of patients presenting in ambulatory care with an acute uncomplicated RTI still received an antibiotic prescription – with many doctors and patients believing that this is the right thing to do (4) |
| USA | - Among commercial health plans between 2008 and 2012, 77% of children in healthcare plans in the US with pharyngitis tested for group A Streptococcus (strep) and received an antibiotic, with avoidance of antibiotic treatment for adults with bronchitis was 24%. It was estimated that the proportion of children that were not prescribed antibiotics for their URTI did not change – ranging from 83.4% to 85% in 2011 (32). - In another study conducted among ambulatory care practices between 2011 and 2012, it was estimated that approximately two-thirds of ambulatory care visits for acute respiratory tract infections may not be appropriate for antibiotic management (33) - In a third study conducted among patients attending the Cleveland Clinic Health System between 2011-2012, 54.8% of patients with a respiratory tract infection received an antibiotic (34) - In a fourth study published by Vaz et al in 2014, among children in 3 commercial health plans, RTIs accounted for a high percentage of all antibiotics prescribed (75%) with pharyngitis was the most common diagnosis associated with an antibiotic in children 6 to <12 years (35) - Overall, the prescribing of antibiotics for patients with acute respiratory infections in the US has decreased from 175 prescriptions per 1000 people in 2000 to 102 in 2010 (36) - In a more recent study, conducted between 2013 and 2015, 41% of 14 987 patients presenting in ambulatory care with an acute respiratory infection were prescribed an antibiotic. Among these 6136 patients, 41% had diagnoses for which antibiotics were not appropriate, with 84% seen as having a viral URTI or bronchitis (37) |

**Table D: Prevalence of Non-Prescription sales of antibiotics particularly for URTIs among LMICs**

| **Country** | **Extent of self-purchasing** |
| --- | --- |
| Bangladesh - 2014 and 2018 | A) First study - 2014 (38):   - Cross-sectional survey among 1300 patients - 26.69% had self-medicated with antibiotics - Perceived symptoms to purchase antibiotics was dysentery, diarrhoea and food poisoning (36.02%) followed by URTIs - cold, cough and fever (28.24%)   B) Second study - 2018 (39):   - Cross-sectional, questionnaire-based study among 250 undergraduate pharmacy students - 15.6% of students self-medicated with antibiotics for predominantly minor illnesses including URTIs - Greater use of antipyretics (58.4%) and analgesics (59.2%) for a range of predominantly minor illnesses |
| Bulgaria – 2014 (40) | - Observational cross-sectional study analyzing patient opinions and attitudes on self-medication with antibiotics including respiratory tract infections (1050 patients) - Self-medication rate with antibiotics was 43% - 24.2% of the patients had started taking antibiotics for a high temperature or fever and 24% for a sore throat and cough |
| China – 2014, 2017 and 2019 | A) First study - 2014 (41):   - Cross-sectional study conducted in vaccination clinics in rural counties in China among primary caregivers (typically parents) - 79% of caregivers thought antibiotics could cure viral infections, and half of the caregivers believed antibiotics could shorten the duration of URTIs resulting in 62% of the parents self-medicating their children with antibiotics   B) Second study - 2017 (42):   - Multicentre cross-sectional study among 256 pharmacists using simulated patients presenting with a URTI - 77.7% of staff dispensed an antibiotic without a prescription despite such practices being banned since 2004, greatest after simulated patient insistence - Pharmacists were only available in 14.8% of community pharmacies, with lower rates of non-prescription sales of antibiotics (but not significant)   C) Third study – 2019 (43)   - Simulated client method study among 2423 community pharmacies in six provinces in China - Non-prescription sales of antibiotics were observed during 70.1% adult URTI interactions |
| Ethiopia – 2015, 2017 and 2018 | A) First study - 2015 (44)   - Comparative cross sectional study design conducted in both urban and rural areas involving 1082 participants - Inappropriate use of antibiotics was 30.9% - self medication at 18.0% and 12.9% coming from family members - Amoxicillin most commonly used antibiotic - urban (67.3%) and rural (62.3%) communities followed by ampicillin - Respiratory tract symptoms were the most common reason for antibiotic use (74.6%)   B) Second study - 2017 (45):   - Community based cross-sectional survey conducted among 650 participants - Nearly half (48.5%) of participants in the survey had taken antibiotics in the previous year, with 36.8% of respondents obtaining their antibiotics from community drug retail outlets without a prescription - Respiratory tract infections (40.9%) the most common reason for which antibiotics were taken   C) Third study - 2018 (46)   - 2 phase mixed-methods study using simulated patients (50 patients) and in-depth interviews among community pharmacists in Ethiopia - 92% of simulated patients were dispensed an antibiotic without a prescription for a URTI, with the most common antibiotics dispensed being amoxicillin and amoxicillin-clavulanic acid - The interviews confirmed that the dispensing of antibiotics for URTIs was a common occurrence enhanced by financial gain and patient expectations |
| Ghana – 2012 and 2018 | A) First study - 2012 (47):   - Descriptive cross-sectional study involving face-to-face interviews with 600 tertiary students - Overall, considerable self-purchasing of antibiotics among tertiary level students (70%); however, significantly lower among medically inclined students - The most common antibiotic used was amoxycillin, and the majority of antibiotics were purchased for colds, coughs and fevers   B) Second study – 2018 (48):   - Twice-weekly visits to 12 households in three rural communities over 8 weeks - Most (65%) medicine-use events involved self-treatment w40% of medicine-use events involving antibiotics often without a prescription - Penicillins were the most commonly dispensed antibiotic   The ease of access to antibiotics in pharmacies makes reducing AMR in Ghana a challenge. This is likely to change in the future with the recent launch of the national action plan in Ghana to reduce AMR (49, 50) |
| India - 2014 and 2015 | A) First study - 2014 (51):   - Community based cross sectional study aiming to gather information about the prevalence of self-medication with any treatment among 600 respondents - 16.7% purchased antibiotics, with self-purchasing of NSAIDs (25.3%), GI medication (20.8%) and antihistamines (19.7%) more common - Fever was the second most common ailment (14.5%) followed by respiratory problems and asthma (11.7%), with coughs and colds at 7%   B) Second study - 2014 (52):   - Prospective cross-sectional survey based study involving 781 members of the general population aged between 18 to 55 years - Prevalence of self-medication with antibiotics was 39.1% - Colds and fever were the most common reasons for antibiotic use (male 47.6%, female 36.7%), with use also for coughs and a sore throat (male 12%, female 8.15)   C) Third study - 2015 (53):   - Cross-sectional study involving simulated clinical scenarios among 261 pharmacies including URTIs - Antimicrobial drugs were obtained without prescription in 66.7 % pharmacies for 2 indications - Overall, antibiotics were dispensed without a prescription in 71.3% of simulated patients with URTIs |
| Indonesia - 2011 (54) | - Cross-sectional population-based survey self-administered to 625 randomly selected respondents over 18 years old, with 599 analysed - Self medication with antibiotics during the month prior to the study was 7.3%, with amoxicillin the most requested antibiotic (77%) - The common cold including a cough and a sore throat were the most common symptoms leading to self-medication |
| Iraq – 2014 | A) First study (55):   - Cross-sectional survey involving 348 patients were ≥ 15 years old - Influenza or the common cold were the commonest indications for self-medication - Antibiotics were the commonest medicines used for self-medication (74.7%)   B) Second study (56):   - Cross-sectional pilot exploratory study with simulated patients among 20 pharmacists with simulated patients asking the pharmacist about the strongest antibiotic for common cold - 45% of community pharmacists dispensed an antibiotic for a common cold usually in conjunction with symptomatic treatment - Amoxicillin was the most common antibiotic dispensed (44.4%) followed by amoxicillin/clavulanate (22.2%)   The purchasing of antibiotics without a prescription takes place despite the legal position, and overall occurs in almost 100% of pharmacies for various conditions in addition to URTIs. This includes all common classes of antibiotics |
| Jordan - 2015 (57) | - Prospective study involving simulated women of childbearing-age with five different clinical scenarios visiting a total of 202 pharmacies - The clinical scenarios included a sore throat, otitis media, acute sinusitis, diarrhoea or a urinary tract infection - The percentage of pharmacies dispensing antibiotics without a prescription included: sore throat (97.6%), urinary tract infection (83.3%), diarrhoea (83%), otitis media (68.4%) and acute sinusitis (48.5%) |
| Lebanon – 2015 (58) | - Descriptive cross-sectional study involving 100 pharmacists in both high and low socioeconomic areas - 71% of pharmacists would prescribe an antibiotic for adults suffering from sore throat and fever, with 43% doing the same for children - Overall, 64% of pharmacists would prescribe antibiotics for adults with a sore throat, high fever and exudation in the absence of cough, 44% would prescribe antibiotics for adults with a cough and fever, and 46% for a cough, fever, chest pain and shortness of breath - Pharmacists working in lower socio-economic areas where more likely to prescribe antibiotics |
| Malaysia - 2013 and 2014 | A) First Study - 2013 (59):   - Cross sectional study involving simulated patients with symptoms of a common cold visiting 20 GP clinics and 50 Pharmacies - Antibiotics were dispensed in 32% of community pharmacies without a prescription – lower that the rate see among physicians (65%) - Greater dispensing of antihistamines (76%) and expectorants/ mucolytics/ antitussives (73%)   B) Second study - 2014 (60):   - Cross-sectional exploratory design with simulated patients with symptoms of a common cold involving 140 visits - 100 visits to 50 pharmacies and 40 visits to 20 GP Clinics - A greater number of GPs (65%) prescribed and dispensed antibiotics than community pharmacists (32%) for symptoms of a common cold - Amoxicillin and co-amoxiclav were the principle antibiotics prescribed/ dispensed |
| Mongolia - 2010 (61) | - Community-based cross-sectional survey involving 503 participating caregivers - 42.3% of children were given non-prescribed antibiotics in the past six months. Commonly treated symptoms with antibiotics were coughs (84%), a fever (66%), a nasal discharge (65%) or a sore throat (60%) - Amoxicillin was the most commonly used antibiotic (58%) followed by ampicillin (25%) |
| Nigeria – 2014, 2016 and 2018 | A) First study - 2014 (62):   - Prevalence study with 423 mother-child pairs - The prevalence of unprescribed (self-purchased) antibiotics in children with URTIs aged <5 years was 75.9% - Antibiotic abuse was commoner in older children with URTIs and among mothers with higher educational attainment   B) Second study - 2016 (63):   - Cross-sectional survey among 1,150 randomly patients attending 25 Primary Health Centers - The prevalence of antibiotics self-medication was common (82.2%) - Ampicillin/ cloxacillin combinations (24.1%) and ampicillin (20.3%) were the most common antibiotics for self-medication - A cough with productive mucus (30.1%) and a sore throat (23.7%) were the most frequent indications for self-medication   C) Third study - 2018 (64):   - Cross-sectional study evaluating the extent of self-medication with antibiotics and knowledge of antibiotic resistance among 1230 undergraduate students and community members - Frequency of antibiotic use among undergraduate students was 43% weekly and 26% weekly among community participants - Amoxicillin/clavulanic acid was the most common antibiotic for self-medication - Greater use of antibiotics for malaria, typhoid and dysentery than ear and throat pain   D) Fourth study - 2018 (65):   - Cross sectional community-based study using a semi-structured and self-administered questionnaire among 400 participants - Non-prescribed antibiotics were taken for asthma (5.7% of participants), sore throat (13.8%), a cold and cough (42.7%), and fever (16%) - Penicillin (58%) was the most regularly taken antibiotics followed by the quinolones (22%) |
| Pakistan - 2012 and 2016 | A) First study - 2012 (66):   - Cross-sectional study among 371 pharmacies using simulated patient to collect information on potential management of patients with acute respiratory tract infections - 82.2 % (n = 305) were dispensed medicines with 7.3 % referred to a physician - 57.4 % were dispensed an antibiotic, 12.8 % an antihistamine and 29.7% a NSAID   B) Second study - 2016 (67):   - Cross sectional study evaluating the use of antibiotics for URTIs among pharmacy and non-pharmacy university students - 87.8% of pharmacy students self-medicated with antibiotics versus 71.4% of non-pharmacy students. Both also used symptomatic treatments – higher in pharmacy students (88.4%) vs. non-pharmacy students (47.2%) - Self-purchased antibiotics included the beta-lactams (45.9%) and macrolides (26.5%) |
| Sri Lanka – 2019 (68) | - Cross-sectional survey among a random sample of community pharmacies (369) across all nine provinces in Sri Lanka using a self-administered questionnaire with 320 responding (pharmacists and pharmacy staff) - One in three pharmacy staff stated they had dispensed antibiotics without a prescription following patients’ request rising to half of the pharmacy staff when the patient was known to them - Approximately 30% of surveyed pharmacists reported to have supplied antibiotics for minor infections in the week prior to the survey |
| Syria – 2011 (69) | - Cross-sectional study involving simulated patients visiting 200 pharmacies with symptoms of URTIs and requesting an antibiotic (despite non-prescription sales prohibited by law) - 87% of pharmacists sold antibiotics without insistence, 10% after insistence, and 3% refused to sell an antibiotic without a prescription - The most common antibiotic sold was co-amoxiclav (50.4% - 2 strengths) followed by amoxicillin (23.1%) |
| Tanzania – 2013 (70) | - Cross-sectional explorative study with simulated patients visiting 145 different pharmacy stores in Tanzania with up to 9 different cases which include symptoms of a URTI - Up to 79% of pharmacy stores sold antibiotics without a prescription including patients with URTIs |
| Thailand – 2014 (71) | - Cross-sectional descriptive research to assess knowledge, attitudes, and practices regarding antibiotics use among 396 adults - 37.4% stated that they sometimes take antibiotics every time they start to feel unwell - 18 – 19% stated they would buy the same antibiotics that worked in the past to save time and money |
| Uganda - 2016 | A) First study (72):   - Cross-sectional survey design study collecting qualitative and quantitative data from 200 households - 43% of children under 5 were being self-medicated with an antibiotic for an acute respiratory tract infection - Penicillins (43%) and sulphonamides (40%) were the most self-prescribed classes of antibiotics for respiratory tract infections   B) Second study (73):   - Cross sectional study visiting 170 drug stores using interviewees discussing children under 5 including those with severe URTIs - 93.5% of stores prescribed and sold antibiotics for patients with signs/ symptoms of severe URTIs - Amoxicillin (89.4%) and cotrimoxazole (95.6%) were the most dispensed antibiotics |
| Vietnam – 2011 and 2014 | A) First study - 2011 (19):   - Caregivers among 828 household were interviewed using a structured questionnaire about actual antibiotic use for children under five with acute respiratory infections in their household - 62% of children had been given antibiotics and 63% of antibiotic courses were used for mild acute respiratory tract infections during a 28-day period. This included both prescribed and non-prescribed antibiotics - Extended spectrum antibiotics such as ampicillin or amoxicillin were the most commonly used antibiotics (49%), followed by cephalosporins (27%)   B) Second study - 2014 (74):   - Cross sectional study observing all medicine sales among 30 private pharmacies (15 Urban and 15 Rural) coupled with semi-structured, in-depth interviews among pharmacists and drug sellers - Antibiotics were the most commonly sold medicines in community pharmacies, with most antibiotics sold without a prescription (88% to 91% of situations) - A cough was the most frequent reason for buying an antibiotic among urban patients (32%) and a fever among rural patients (22%) |
| Zambia – 2016 (75) | - Structured, interviewer-administered questionnaire among 73 pharmacy personnel (one in each of 73 community pharmacies). Questionnaire included simulated case of a paediatric patient with a respiratory tract infection - All community pharmacies dispensed antibiotics without a prescription - Commonly requested and dispensed antibiotics without a prescription included amoxicillin (52%) and cotrimoxazole (25%) - 74% of community pharmacists would dispense an antibiotic without a prescription for a child with a respiratory tract infection |

**NB**: Most acute respiratory tract infections (ARIs) are URTIs (Upper respiratory tract infections) rather than lower respiratory tract infections. However, reported as ARIs in the Table if the authors had not distinguished between the different types of ARI (17, 76)

**Table E: Summary of activities among high income countries/ internationally to reduce inappropriate antibiotic prescribing among physicians especially for patients with acute respiratory tract infections**

| **Country** | **Initiative and outcome** |
| --- | --- |
| International/ US (77-79) | A) AHRQ (US Agency for Healthcare Research & Quality)   - Point-of-care testing generally reduces the overprescribing of antibiotics for patients with acute respiratory tract infections, with the addition of rapid streptococcal antigen test­ing decreasing overall antibiotic prescribing by 20% to 52% and decreasing inappropriate prescribing by 33% over usual care - Procal­citonin testing has reduced antibiotic prescribing in adults by 12% to 72%, but increased by 22% antibiotic prescriptions in chil­dren - C-reactive protein testing has also reduced antibiotic prescribing by 1.9% to 33.5%; however, this has been associ­ated with an increase in hospitalizations at one month (1.1% vs. 0.2% of those who received usual care)   B) Review of McDonagh et al   - Twenty-six interventions were evaluated regarding their effectiveness to reduce inappropriate prescribing of antibiotics for patients with acute respiratory tract infections - Four interventions had moderate-strength evidence of improved prescribing; these were:   - Parent education: 21% reduction in antibiotic prescribing, no increase in return visits   - Combined patient/clinician education: 7% reduction in antibiotic prescribing, no change in complication or satisfaction rates   - Procalcitonin testing for adults: 12%–72% reduction in antibiotic use, no increased adverse consequences   - Electronic decision support systems: 24%–47% improvement in appropriate prescribing, 5%–9% reduction in inappropriate use of antibiotics, no increase in complication rates |
| Pan-European (80) | - Multinational, cluster, randomised, factorial, controlled trial involving 246 GP (family medicine) practices with patients with respiratory tract infections including URTIs - Internet training in communication skills and point-of-care testing achieved important reductions in antibiotic prescribing for acute RTIs across European countries with different languages and cultural boundaries - The combined intervention achieved the greatest reduction in the prescribing rate of antibiotics (combined risk ratio 0·38, 0·25–0·55, p<0·0001). |
| Australia (20) | - A series of comprehensive educational as well as advertising campaigns were undertaken with general practitioners and consumers across Australia between 2009 and 2015 with the aim of reducing antibiotic prescriptions for patients with URTIs - A Bayesian structural time series model was used to forecast dispensing volumes if the interventions had not taken place and compared with actual volumes - Overall, there was a 14% reduction in dispensed prescriptions after the multifaceted interventions |
| France (81) | - A multifaceted educational programme was instigated among 7 paediatric emergency departments in France between November 2009 to October 2014 - The programme consisted of local protocol implementation, education sessions, and feedback - The intervention resulted in a significant change in the rate of antibiotic prescriptions per 1000 PED visits (-0.4% per 15-day period, P = .04) with the cumulative effect estimated to be an overall 30.9% reduction in antibiotic prescriptions |
| Netherlands (82) | - A pragmatic, cluster-randomized intervention trial in 88 Dutch primary care practices involving interventions to improve the management of patients with respiratory tract and ear infections (respiratory tract infections) - The intervention was physician education and audit/feedback on the quantity and quality of their antibiotic prescribing - The number and types of antibiotics prescribed were analysed from 1 year prior to the intervention to 2 years after the intervention - Overall, the over prescribing of antibiotics for respiratory tract infections decreased from 44% of prescriptions to 28% following the intervention |
| Norway (83) | - Cluster randomised controlled study comprising 382 general practitioners to help improve antibiotic prescribing in patients with acute respiratory tract infections - The intervention groups had two visits by academic detailers including feedback reports on each GP’s antibiotic prescribing profile the preceding year - There was a reduction (odds ratio 0.72, 95% confidence interval 0.61 to 0.84) in the prescribing of antibiotics for acute respiratory tract infections in the intervention compared with control groups |
| Spain (84) | - Cross-sectional before/after study carried out in one Region of Spain involving multiple training sessions with GPs on national guidelines to improve the use of antibiotics in ambulatory care including patients with acute respiratory tract infections - Appropriate antibiotic prescribing in patients increased from 36% of prescriptions in 2009 to 57 % in 2012 (p<0.001) - The greatest improvement was seen with beta-lactam antibiotics and in the treatment of respiratory and skin infections |
| United Kingdom (85) | - Randomised, 2 × 2 factorial trial involving 1581 GP practices in England - Every GP in the intervention group was sent a letter from England’s Chief Medical Officer accompanied by a leaflet on appropriate antibiotics for use with patients. The letter stated that their GP practice was prescribing antibiotics at a higher rate than 80% of GP practices in the locality - The rate of antibiotic items dispensed per 1000 population decreased from 131.25 in the control group to 126·98 in the intervention group. This decrease of 4·27 (3·3%; p<0·0001), representing an estimated 73,406 fewer antibiotic items dispensed for limited cost - The authors concluded that social norm feedback from a senior governmental source indicating high prescribing of antibiotics significantly reduced antibiotic prescribing at low costs |
| USA | A) First Study (2013) (86)   - Three-arm, cluster-randomized trial among 33 primary care practices belonging to an integrated health care system regarding the management of acute bronchitis - The printed intervention arm received decision support print-based management plan, the computerized intervention group received decision support through an electronic medical record-based strategy, with the third group as the control arm. Both intervention groups also received educational input, feedback on their prescribing practices, and education brochures to use with patients - Compared with the baseline period, the % of patients prescribed antibiotics for acute bronchitis decreased from 80.0% to 68.3% in physicians receiving printed material, decreased from 74.0% to 60.7% in those physicians with computerized intervention sites but increased slightly 72.5% to 74.3% among the control group   B) Second Study (2015) (87)   - Retrospective time series study among 118 providers at seven sites to assess the impact of interventions to reduce prescribing of antibiotics for uncomplicated acute respiratory infection. The main outcome measures included a potential reduction in antibiotic prescribing and physician visits avoided - Data were collected from January 2010 to November 2013, with the interventions occurring in March 2012 - The intervention included academic detailing, auditing of prescribing with additional coaching for high prescribers. In addition, established patients who called to schedule a physician visit for acute respiratory infection related symptoms were offered a nurse phone care instead - The intervention was associated with a 16.5% absolute decrease in the antibiotic prescribing rate and 8.3% episodes did not require any provider visit   C) Third Study (2016) (88)   - Prospective study involving three behviousal interventions among physicians in 47 ambulatory care practices in Boston and Los Angeles to reduce inappropriate prescribing for acute respiratory infections - Intervention implemented alone or in combination and included (i) suggested alternatives in electronic order sets suggesting for instance non-antibiotic treatments for these infections; (ii) accountable justification - prompting clinicians to enter free-text justifications for prescribing any antibiotic for these infections; (iii) peer comparisons with "top performers" - Mean antibiotic prescribing rates decreased from 22.1% (18 months pre-intervention) to 6.1% for suggested alternatives 18 months post intervention; from 23.2% to 5.2% for accountable justification; and from 19.9% to 3.7% for peer comparison |

**Table F: Antibiotic Public Awareness Campaigns and their influence especially in High Income Countries**

| **Country** | **Details** |
| --- | --- |
| Europe - 2013 (89) | - Comparable data on systemic antibiotics administered among 21 European countries combined with data on national campaigns from the public health literature - Public campaigns significantly reduced ambulatory care antibiotic utilisation by 1.3 to 5.6 DIDs equating to a mean reduction of 6.5 to 28.3 % on pre-intervention levels |
| European Commission – 2009 and 2013 (90) | - The Eurobarometer surveys showed there was an increase in the number of people who responded that antibiotics do not kill viruses and are not effective against influenza and colds between 2009 and 2013 - This was seen as encouraging since the key messages of European Antibiotic Awareness Day campaigns were to reduce unnecessary requests and use of antibiotics for such infections |
| England – 2015 (91, 92) | - Sustained regional multimodal campaign in the north of England targeting patients and physicians centring around Moxy Malone, a cartoon character developed for use in campaign materials, including posters, television, radio coupled with prescribing support over 2 years - This resulted in a 5.8% reduction in prescription rates, equivalent to 21.7 fewer items prescribed per 1000 population |
| France 2009, 2011 and 2014 | A) First study – 2009 (93)   - Nationwide study evaluating antibiotic utilisation in France following a sustained national campaign aimed at patients as well as parents of children to reduce ambulatory care antibiotic prescribing principally among children with viral respiratory tract infections - Overall antibiotic utilisation decreased by 26.5% post the sustained campaign compared to the preintervention period - The greatest decline (- 35.8%) was seen among young children aged 6–15 years, with a significant reduction (-45%) in patients with flu-like syndromes receiving an antibiotic   B) Second study – 2011 (94)   - Evaluating antibiotic prescriptions and consultation rates for respiratory tract infections following yearly public antibiotic campaign since 2002 - Between 2001 and 2009, a 33% in reduction in prescriptions for respiratory tract infections was observed alongside a 23% reduction in physician consultations for respiratory tract infections - The proportion of consultations resulting in antibiotic prescriptions also decreased from 58% to 46%   C) Third study – 2014   - Nationwide study with an interrupted time series design - Compared to the precampaign (2000-2002) period, antibiotic prescriptions decreased during campaign periods until the winter of 2006 to 2007 (-30%). Subsequently, they stabilized except for individuals >60 years of age in whom prescriptions rose to precampaign levels - During the warm months (April to September) there was no appreciable change in antibiotic utilisation patterns, although seniors had an increasing trend in their utilisation |
| Singapore 2017 (95) | - Study assessing the influence of a patient-targeted education via discussions and pamphlets among 914 patients in reducing antibiotic prescriptions for URTIs among adults attending private ambulatory care facilities - The intervention did not significantly reduce antibiotic prescriptions except in patients of Indian ethnicity - A positive association between the intervention and the view that antibiotics were not needed most of the time for URTIs was also restricted to the Indian subgroup |
| USA | A) First study 2005 (96)   - This study was launched in 1999 to educate physicians and the public about the appropriate use of antibiotics especially for respiratory tract infections - Public education included advertisements on radio and TV, posters, pamphlets, and presentations at childcare centres - Overall antibiotic prescribing declined between 19.8% to 20.4% in the two settings from 1998 to 2003   B) Second study (97)   - Multifaceted intervention campaign to try and reduce inappropriate prescribing of antibiotics for patients with URTIs involving both health care professionals and patients - There was a 15.6% decrease in the number of patients who received antibiotics for URTIs during the intervention period in the targeted group versus a 1.5% decrease in the control group (P=.006) |

**NB**: URTI = upper respiratory tract infection

**Box A: General Indicators That Have Been Used To Assess The Quality Of Antibiotic Prescribing In Ambulatory Care (98-105)**

| - Utilisation of penicillins (J01C) as a % of total antibiotic use - % utilisation of combination penicillins such as co-amoxiclav as a percentage of amoxycillin use - The proportion of amoxicillin users (amoxicillin index) - The ratio between users of amoxicillin to broad-spectrum penicillins, cephalosporins and macrolides (*A*/*B* ratio) - % utilisation of cephalosporins ((J01D) as a % vs. total antibiotics - % utilisation of third- and fourth-generation cephalosporins vs first and second generation cephalosporins - % utilisation of macrolides (J01F) as a % vs. total antibiotics - % utilisation of quinolones (J01M) as % vs. total antibiotic use - % broad to narrow-spectrum penicillins, cephalosporins and macrolides (B/N ratio) |
| --- |

**Box B: Examples of Current Quality Indicators for Antibiotics in Slovenia**

| A) General QIs for general practitioners:   - Prevalence of prescribing of antibiotics (Number of patients/1000 who get at least 1 prescription per year) - The ratio broad versus narrow spectrum antibiotics as well as the ratio of quinolones and cephalosporins compared with all antibiotics   B) Every GP has on the social insurance website their own data regarding their QIs as well as a table documenting for every patient prescribed an antibiotic during the year:   - Number of patients - Number of prescriptions - Number of antibiotic DDDs - Share of antibiotics versus total medicines prescribed (DDD basis)   C) For Paediatricians: Prevalence of prescribing of antibiotics (No. of patients/1000 who get at least 1 prescription per year and standardised by age)   - % of antibiotics in all prescriptions (DDD basis) - % of patients who are prescribed another antibiotic within 14 days after the first one - % of topical antibiotics in DDDs in all prescriptions - The ratio broad/narrow spectrum antibiotics prescriptions - The ratio of amoxicillin vs co-amoxyclav prescriptions |
| --- |

NB: DDD = Defined Daily Dose, QIs = Quality indicators

**Box C: HEDIS Datasets - Specific Indicators for Patients with URTIs (32)**

| - Appropriate testing for children with pharyngitis, i.e. % of children 2 to 18 years of age diagnosed with pharyngitis, prescribed an antibiotic and received a group A *Streptococcus* (strep) test. The mean performance across all health plans in the US in 2012 was 80% (range 2–97%) versus a goal of 100% - Appropriate treatment for children with URTIs, i.e. of children 3 months to 18 years of age, with URTIs not prescribed antibiotics on or three days after the episode date. Mean performance in the US in 2012 was 83% (range 45–99%) versus a goal of 100% - Avoidance of antibiotics in adults with acute bronchitis, i.e. % of adults diagnosed with acute bronchitis not dispensed an antibiotic. Mean performance in 2012 was 23% (range 7-72%) versus a goal of 100%. - These findings have resulted in advice from the American College of Physicians in the US that clinicians should not initiate antibiotics in patients with bronchitis unless pneumonia is suspected - Patients with symptoms suggestive of group A streptococcal pharyngitis should have a rapid antigen detection test or culture, and only be treated with antibiotics if they have confirmed streptococcal pharyngitis - Clinicians should reserve antibiotics for acute rhinosinusitis only prescribe them for patients presenting with persistent symptoms, onset of severe symptoms, signs of a high fever, have a purulent nasal discharge or facial pain, or worsening of symptoms - Clinicians should not prescribe antibiotics for a common cold (106) |
| --- |

NB: URTIs = Upper respiratory tract infections

**Box D: Protocol for Testing Suggested QIs for Managing Patients with URTIs in ambulatory care (Adapted From (107))**

| ***Necessity/ Clarity/ Acceptability***   - Assessment of current indicators, e.g. Boxes 1 and 2, and their applicability in the pertinent LMIC before developing potential new QIs - The wording of any new QI developed/used must be clear and precise with unambiguous language - The indicators used/developed must be within the control of the ambulatory care physicians that will be assessed and acceptable to them/aligned with their professional values   ***Content validity***   - The (new/ existing) indicator represents agreed high quality care and is consequently a valid indicator of the quality of prescribing. - There is sufficient evidence/ professional consensus to support new/ existing QIs (building on necessity) with clear benefits to the patient (patient values) - Each indicator is underpinned by a published evidence base - Adherence to the indicator (new/ existing) should be based on ambulatory care physicians adhering to the indicator providing a higher quality of care than currently provided   ***Technical feasibility and reliability of data extraction / data availability***   - Ability to write and integrate data into current health information systems - Ability to produce reports assessing the quality of prescribing within a reasonable time frame and budget   ***Implementation and monitoring***   - Any new indicator/ existing indicator used must be able to discriminate between physicians in terms of the quality of care provided - Any new indicator developed must also be sensitivity to change (addressed through a potential pilot project) - Clinical staff must be able to interpret any instigated indicator – and act upon the findings - Before implementing any indicator: - Changes required to implement any indicator including for instance any physical capital/staffing changes or changes to regulation, policies and education, must be fully assessed before implementation - Workload implications of implementing any indicator must also be fully assessed before implementation - Potential barriers among different stakeholder groups to the implementation of any indicator must also be assessed and addressed before implementation - There must also be continual monitoring in case of any unintended consequences to the implementation any indicator (positive or negative) as these must also be addressed for the future |
| --- |

**References**

1. World Bank. World Bank Country and Lending Groups - Country Classifictions. 2018. Available at URL: <https://datahelpdesk.worldbank.org/knowledgebase/articles/906519-world-bank-country-and-lending-groups>.

2. Biezen R, Brijnath B, Grando D, Mazza D. Management of respiratory tract infections in young children-A qualitative study of primary care providers' perspectives. NPJ primary care respiratory medicine. 2017;27(1):15.

3. Fletcher-Lartey S, Yee M, Gaarslev C, Khan R. Why do general practitioners prescribe antibiotics for upper respiratory tract infections to meet patient expectations: a mixed methods study. BMJ open. 2016;6(10):e012244.

4. NICE Guidance. Respiratory tract infections (selflimiting): prescribing antibiotics (CG69). 2008. Available at URL: <https://www.nice.org.uk/guidance/cg69/resources/respiratory-tract-infections-selflimiting-prescribing-antibiotics-pdf-975576354757>.

5. Ciesla G, Leader S, Stoddard J. Antibiotic prescribing rates in the US ambulatory care setting for patients diagnosed with influenza, 1997-2001. Respir Med. 2004;98(11):1093-101.

6. Zoorob R, Sidani MA, Fremont RD, Kihlberg C. Antibiotic use in acute upper respiratory tract infections. American family physician. 2012;86(9):817-22.

7. Statistics Botswana. HEALTH STATISTICS report 2010. Available at URL: <http://www.statsbots.org.bw/sites/default/files/Health%20Statistics%20Report%202010.pdf>.

8. Central Statistical Agency (Ethiopia) and ICF International . Ethiopia Demographic and Health Survey 2011. Available from: <http://www.usaid.gov/sites/default/files/documents/1860/Demographic%20Health%20Survey%202011%20Ethiopia%20Final%20Report.pdf>.

9. World Health Oraganization. WHO Country Cooperation Strategy for Ghana in 2005. WHO Regional Office for Africa, Brazaville, Africa.

10. Selwyn BJ. The epidemiology of acute respiratory tract infection in young children: comparison of findings from several developing countries. Coordinated Data Group of BOSTID Researchers. Reviews of infectious diseases. 1990;12 Suppl 8:S870-88.

11. Masavkar SP, Naikwadi AM. Study of incidence of upper respiratory tract infections in urban and rural population. Sch J App Med Sci. 2016; 4(6C): 2023-2026. Available at URL: <https://pdfs.semanticscholar.org/13c3/d448bfa38ed3edc4de7ac49cb3bb98ca12ff.pdf>.

12. Ramani VK, Pattankar J, Puttahonnappa SK. Acute Respiratory Infections among Under-Five Age Group Children at Urban Slums of Gulbarga City: A Longitudinal Study. Journal of Clinical and Diagnostic Research. 2016;10(5):LC08-LC13.

13. Krishnan A, Amarchand R, Gupta V, Lafond KE, Suliankatchi RA, Saha S, et al. Epidemiology of acute respiratory infections in children - preliminary results of a cohort in a rural north Indian community. BMC Infect Dis. 2015;15:462.

14. Jain N, Lodha R, Kabra SK. Upper respiratory tract infections. Indian journal of pediatrics. 2001;68(12):1135-8.

15. Manmohan, Bhargava SK. Acute respiratory infection. Indian Pediatr 1984; 211–213.

16. Rezal RS, Hassali MA, Alrasheedy AA, Saleem F, Yusof FA, Kamal M, et al. Prescribing patterns for upper respiratory tract infections: a prescription-review of primary care practice in Kedah, Malaysia, and the implications. Expert review of anti-infective therapy. 2015;13(12):1547-56.

17. Cox M, Rose L, Kalua K, de Wildt G, Bailey R, Hart J. The prevalence and risk factors for acute respiratory infections in children aged 0-59 months in rural Malawi: A cross-sectional study. Influenza and other respiratory viruses. 2017;11(6):489-96.

18. National Population Commission (NPC) (Nigeria) and ICF International. Nigeria Demographic and Health Survey 2013. Abuja, Nigeria, and Rockville, Maryland, USA: NPC and ICF International. Available at URL: <https://dhsprogram.com/pubs/pdf/fr293/fr293.pdf>

19. Nguyen QH, Nguyen TK, Ho D, Larsson M, Eriksson B, Lundborg CS. Unnecessary antibiotic use for mild acute respiratory infections during 28-day follow-up of 823 children under five in rural Vietnam. Trans R Soc Trop Med Hyg. 2011;105(11):628-36.

20. Wu J, Taylor D, Ovchinikova L, Heaney A, Morgan T, Dartnell J, et al. Relationship between antimicrobial-resistance programs and antibiotic dispensing for upper respiratory tract infection: An analysis of Australian data between 2004 and 2015. The Journal of international medical research. 2018;46(4):1326-38.

21. Aabenhus R, Hansen MP, Saust LT, Bjerrum L. Characterisation of antibiotic prescriptions for acute respiratory tract infections in Danish general practice: a retrospective registry based cohort study. NPJ primary care respiratory medicine. 2017;27(1):37.

22. Antonanzas F, Goossens H. The economics of antibiotic resistance: a claim for personalised treatments. [Eur J Health Econ.](https://www.ncbi.nlm.nih.gov/pubmed/?term=he+economics+of+antibiotic+resistance%3A+a+claim+for+personalised) 2019;20(4):483-485

23. Pouwels KB, Dolk FCK, Smith DRM, Robotham JV, Smieszek T. Actual versus 'ideal' antibiotic prescribing for common conditions in English primary care. The Journal of antimicrobial chemotherapy. 2018;73(suppl_2):19-26.

24. Butler CC, Hood K, Verheij T, Little P, Melbye H, Nuttall J, et al. Variation in antibiotic prescribing and its impact on recovery in patients with acute cough in primary care: prospective study in 13 countries. BMJ. 2009;338:b2242-b.

25. Kamradt M, Kaufmann-Kolle P, Andres E, Brand T, Klingenberg A, Glassen K, et al. Sustainable reduction of antibiotic-induced antimicrobial resistance (ARena) in German ambulatory care: study protocol of a cluster randomised trial. Implement Sci. 2018;13(1):23.

26. Kraus EM, Pelzl S, Szecsenyi J, Laux G. Antibiotic prescribing for acute lower respiratory tract infections (LRTI) - guideline adherence in the German primary care setting: An analysis of routine data. PloS one. 2017;12(3):e0174584.

27. Bianco A, Papadopoli R, Mascaro V, Pileggi C, Pavia M. Antibiotic prescriptions to adults with acute respiratory tract infections by Italian general practitioners. Infection and drug resistance. 2018;11:2199-205.

28. Welschen I, Kuyvenhoven MM, Hoes AW, Verheij TJM. Effectiveness of a multiple intervention to reduce antibiotic prescribing for respiratory tract symptoms in primary care: randomised controlled trial. BMJ. 2004;329(7463):431-.

29. Gjelstad S, Dalen I, Lindbæk M. GPs’ antibiotic prescription patterns for respiratory tract infections – still room for improvement. Scandinavian journal of primary health care. 2009;27(4):208-15.

30. Lee ML, Cho CY, Hsu CL, Chen CJ, Chang LY, Lee YS, et al. Recent trends in antibiotic prescriptions for acute respiratory tract infections in pediatric ambulatory care in Taiwan, 2000-2009: A nationwide population-based study. Journal of microbiology, immunology, and infection. 2016;49(4):554-60.

31. Chang LY, Lai CC, Chen CJ, Cho CY, Luo YC, Jeng MJ, et al. Recent trends in prescribing antibiotics for acute tonsillitis in pediatric ambulatory care in Taiwan, 2000-2009: A nationwide population-based study. Journal of microbiology, immunology, and infection. 2017;50(4):500-6.

32. Roberts RM, Hicks LA, Bartoces M. Variation in US outpatient antibiotic prescribing quality measures according to health plan and geography. The American journal of managed care. 2016;22(8):519-23.

33. Renati S, Linder JA. Necessity of office visits for acute respiratory infections in primary care. Fam Pract. 2016;33(3):312-7.

34. Manne M, Deshpande A, Hu B, Patel A, Taksler GB, Misra-Hebert AD, et al. Provider Variation in Antibiotic Prescribing and Outcomes of Respiratory Tract Infections. Southern medical journal. 2018;111(4):235-42.

35. Vaz LE, Kleinman KP, Raebel MA, Nordin JD, Lakoma MD, Dutta-Linn MM, et al. Recent trends in outpatient antibiotic use in children. Pediatrics. 2014;133(3):375-85.

36. Lee GC, Reveles KR, Attridge RT, Lawson KA, Mansi IA, Lewis JS, 2nd, et al. Outpatient antibiotic prescribing in the United States: 2000 to 2010. BMC medicine. 2014;12:96.

37. Havers FP, Hicks LA, Chung JR, Gaglani M, Murthy K, Zimmerman RK, et al. Outpatient Antibiotic Prescribing for Acute Respiratory Infections During Influenza Seasons. JAMA Netw Open. 2018;1(2):e180243.

38. Biswas M, Roy MN, Manik MI, Hossain MS, Tapu SM, Moniruzzaman M, et al. Self medicated antibiotics in Bangladesh: a cross-sectional health survey conducted in the Rajshahi City. BMC public health. 2014;14:847.

39. Seam MOR, Bhatta R, Saha BL, Das A, Hossain MM, Uddin SMN, et al. Assessing the Perceptions and Practice of Self-Medication among Bangladeshi Undergraduate Pharmacy Students. Pharmacy. 2018;6(1).

40. Dimova R, Dimitrova D, Semerdjieva M, Doikov I. Patient Attitudes and Patterns of Self-Medication with Antibiotics – A Cross-Sectional Study in Bulgaria. Maced J Med Sci. 2014 Dec 15; 7(4):655-61.

41. Yu M, Zhao G, Stålsby Lundborg C, Zhu Y, Zhao Q, Xu B. Knowledge, attitudes, and practices of parents in rural China on the use of antibiotics in children: a cross-sectional study. BMC Infectious Diseases. 2014;14:112-.

42. Chang J, Ye D, Lv B, Jiang M, Zhu S, Yan K, et al. Sale of antibiotics without a prescription at community pharmacies in urban China: a multicentre cross-sectional survey. The Journal of antimicrobial chemotherapy. 2017;72(4):1235-42.

43. Chang J, Xu S, Zhu S, Li Z, Yu J, Zhang Y, et al. Assessment of non-prescription antibiotic dispensing at community pharmacies in China with simulated clients: a mixed cross-sectional and longitudinal study. The Lancet Infectious diseases. 2019.

44. Gebeyehu E, Bantie L, Azage M. Inappropriate Use of Antibiotics and Its Associated Factors among Urban and Rural Communities of Bahir Dar City Administration, Northwest Ethiopia. PloS one. 2015;10(9):e0138179.

45. Erku DA, Mekuria AB, Belachew SA. Inappropriate use of antibiotics among communities of Gondar town, Ethiopia: a threat to the development of antimicrobial resistance. Antimicrobial Resistance & Infection Control. 2017;6(1):112.

46. Erku DA, Aberra SY. Non-prescribed sale of antibiotics for acute childhood diarrhea and upper respiratory tract infection in community pharmacies: a 2 phase mixed-methods study. Antimicrob Resist Infect Control. 2018;7:92.

47. Donkor ES, Tetteh-Quarcoo PB, Nartey P, Agyeman IO. Self-medication practices with antibiotics among tertiary level students in Accra, Ghana: a cross-sectional study. Int J Environ Res Public Health. 2012;9.

48. Ahiabu MA, Magnussen P, Bygbjerg IC, Tersbol BP. Treatment practices of households and antibiotic dispensing in medicine outlets in developing countries: The case of Ghana. Research in social & administrative pharmacy. 2018;14(12):1180-8.

49. Yevutsey SK, Buabeng KO, Aikins M, Anto BP, Biritwum RB, Frimodt-Moller N, et al. Situational analysis of antibiotic use and resistance in Ghana: policy and regulation. BMC public health. 2017;17(1):896.

50. Fleming Fund - Ghana. Overview of country activity. 2018. Available at URL: <https://www.flemingfund.org/countries/ghana/>.

51. Ahmad A, Patel I, Mohanta G, Balkrishnan R. Evaluation of self medication practices in rural area of town sahaswan at northern India. Annals of medical and health sciences research. 2014;4(Suppl 2):S73-S8.

52. Ganesan N, Subramanian S, Jaikumar RH, et al.: Self-medication and indiscriminate use of antibiotics without prescription in Chennai, India: a major public health problem. J Club Pharmaceutical Sciences. 2014, 1:131-41.

53. Shet A, Sundaresan S, Forsberg BC. Pharmacy-based dispensing of antimicrobial agents without prescription in India: appropriateness and cost burden in the private sector. Antimicrobial Resistance and Infection Control. 2015;4:55.

54. Widayati A, Suryawati S, de Crespigny C, Hiller JE. Self medication with antibiotics in Yogyakarta City Indonesia: a cross sectional population-based survey. BMC research notes. 2011;4(1):491.

55. Jasim AL, Fadhil TA, Taher SS: Self-medication practice among Iraqi patients in Baghdad city. Am J Pharmacol Sci. 2014; 2:18-23.

56. Mikhael EM. Evaluating the rationality of antibiotic dispensing in treating common cold infections among pharmacists in Baghdad, Iraq. Br J Pharm Res 2014; 4: 2653-2661.

57. Almaaytah A, Mukattash TL, Hajaj J. Dispensing of non-prescribed antibiotics in Jordan. Patient preference and adherence. 2015;9:1389-95.

58. Farah R, Lahoud N, Salameh P, Saleh N. Antibiotic dispensation by Lebanese pharmacists: a comparison of higher and lower socio-economic levels. Journal of infection and public health. 2015;8(1):37-46.

59. Alabid AHMA, Ibrahim MIM , Hassali MAA. Dispensing practices of general practitioners and community pharmacists in Malaysia—a pilot study. J Pharm Pract Res 2013;43:187–9

60. Alabid AHMA, Ibrahim MIM, Hassali MA. Antibiotics Dispensing for URTIs by Community Pharmacists (CPs) and General Medical Practitioners in Penang, Malaysia: A Comparative Study using Simulated Patients (SPs). Journal of clinical and diagnostic research. 2014;8(1):119-23.

61. Togoobaatar G, Ikeda N, Ali M, Sonomjamts M, Dashdemberel S, Mori R, et al. Survey of non-prescribed use of antibiotics for children in an urban community in Mongolia. Bulletin of the World Health Organization. 2010;88(12):930-6.

62. Ekwochi U, Chinawa JM, Osuorah CD, Odetunde OI, Obu HA, Agwu S. The use of unprescribed antibiotics in management of upper respiratory tract infection in children in Enugu, South East Nigeria. Journal of tropical pediatrics. 2014;60(3):249-52.

63. Abdulraheem IS AA, Fatiregun AA. Self-medication with Antibiotics: Empirical Evidence from a Nigerian Rural Population BJPR. 2016;11(5):1-13.

64. Ajibola O, Omisakin AO, Eze AA, Omoleke AS. Self-Medication with Antibiotics, Attitude and Knowledge of Antibiotic Resistance among Community Residents and Undergraduate Students in Northwest Nigeria. Diseases. 2018;6(2).

65. Badger-Emeka LI, Emeka PM, Okosi M. Evaluation of the extent and reasons for increased non-prescription antibiotics use in a University town, Nsukka Nigeria. International journal of health sciences. 2018;12(4):11-7.

66. Hussain A , Ibrahim MIM , Malik M . Assessment of disease management of acute respiratory tract infection at community pharmacies through simulated visits in Pakistan. Lat Am J Pharm 2012;31:1435–40.

67. Saleem Z, Saeed H, Ahmad M, Yousaf M, Hassan HB, Javed A, et al. Antibiotic Self-Prescribing Trends, Experiences and Attitudes in Upper Respiratory Tract Infection among Pharmacy and Non-Pharmacy Students: A Study from Lahore. PloS one. 2016;11(2):e0149929.

68. Zawahir S, Lekamwasam S, Aslani P. A cross-sectional national survey of community pharmacy staff: Knowledge and antibiotic provision. PloS one. 2019;14(4):e0215484-e.

69. Al-Faham Z, Habboub G, Takriti F. The sale of antibiotics without prescription in pharmacies in Damascus, Syria. Journal of infection in developing countries. 2011;5(5):396-9.

70. Minzi OM, Manyilizu VS. Application of basic pharmacology and dispensing practice of antibiotics in accredited drug-dispensing outlets in Tanzania. Drug, Healthcare and Patient Safety. 2013;5:5-11.

71. Sirijoti K, Hongsranagon P, Havanond P, et al.: Assessment of knowledge attitudes and practices regarding antibiotic use in Trang province, Thailand. J Health Res. 2014: 28:299-307.

72. Kibuule D, Kagoya HR, Godman B. Antibiotic use in acute respiratory infections in under-fives in Uganda: findings and implications. Expert review of anti-infective therapy. 2016;14(9):863-72.

73. Mbonye AK, Buregyeya E, Rutebemberwa E, Clarke SE, Lal S, Hansen KS, et al. Prescription for antibiotics at drug shops and strategies to improve quality of care and patient safety: a cross-sectional survey in the private sector in Uganda. BMJ open. 2016;6(3):e010632.

74. Nga DTT, Chuc NTK, Hoa NP, Hoa NQ, Nguyen NTT, Loan HT, et al. Antibiotic sales in rural and urban pharmacies in northern Vietnam: an observational study. BMC Pharmacology & Toxicology. 2014;15:6-.

75. Kalungia AC, Burger J, Godman B, Costa JO, Simuwelu C. Non-prescription sale and dispensing of antibiotics in community pharmacies in Zambia. Expert review of anti-infective therapy. 2016;14(12):1215-23.

76. Kumar P, Medigeshi GR, Mishra VS, Islam M, Randev S, Mukherjee A, et al. Etiology of Acute Respiratory Infections in Infants: A Prospective Birth Cohort Study. The Pediatric infectious disease journal. 2017;36(1):25-30.

77. Saguil A. Interventions to Improve Antibiotic Prescribing for Uncomplicated Acute RTIs. American family physician. 2016;94(11):918-20.

78. McDonagh MS, Peterson K, Winthrop K, Cantor A, Lazur BH, Buckley DI. Interventions to reduce inappropriate prescribing of antibiotics for acute respiratory tract infections: summary and update of a systematic review. The Journal of international medical research. 2018;46(8):3337-57.

79. McDonagh M, Peterson K, Winthrop K, Cantor A, Holzhammer B, Buckley DI. AHRQ Comparative Effectiveness Reviews. Improving Antibiotic Prescribing for Uncomplicated Acute Respiratory Tract Infections. Rockville (MD): Agency for Healthcare Research and Quality (US); 2016.

80. Little P, Stuart B, Francis N, Douglas E, Tonkin-Crine S, Anthierens S, et al. Effects of internet-based training on antibiotic prescribing rates for acute respiratory-tract infections: a multinational, cluster, randomised, factorial, controlled trial. Lancet. 2013;382(9899):1175-82.

81. Ouldali N, Bellettre X, Milcent K, Guedj R, de Pontual L, Cojocaru B, et al. Impact of Implementing National Guidelines on Antibiotic Prescriptions for Acute Respiratory Tract Infections in Pediatric Emergency Departments: An Interrupted Time Series Analysis. Clinical infectious diseases. 2017;65(9):1469-76.

82. van der Velden AW, Kuyvenhoven MM, Verheij TJ. Improving antibiotic prescribing quality by an intervention embedded in the primary care practice accreditation: the ARTI4 randomized trial. The Journal of antimicrobial chemotherapy. 2016;71(1):257-63.

83. Gjelstad S, Hoye S, Straand J, Brekke M, Dalen I, Lindbaek M. Improving antibiotic prescribing in acute respiratory tract infections: cluster randomised trial from Norwegian general practice (prescription peer academic detailing (Rx-PAD) study). BMJ. 2013;347:f4403.

84. Fernandez Urrusuno R, Flores Dorado M, Vilches Arenas A, Serrano Martino C, Corral Baena S, Montero Balosa MC. Improving the appropriateness of antimicrobial use in primary care after implementation of a local antimicrobial guide in both levels of care. European journal of clinical pharmacology. 2014;70(8):1011-20.

85. Hallsworth M, Chadborn T, Sallis A, Sanders M, Berry D, Greaves F, et al. Provision of social norm feedback to high prescribers of antibiotics in general practice: a pragmatic national randomised controlled trial. Lancet. 2016;387(10029):1743-52.

86. Gonzales R, Anderer T, McCulloch CE, Maselli JH, Bloom FJ, Jr., Graf TR, et al. A cluster randomized trial of decision support strategies for reducing antibiotic use in acute bronchitis. JAMA Intern Med. 2013;173(4):267-73.

87. Pittenger K, Williams BL, Mecklenburg RS, Blackmore CC. Improving acute respiratory infection care through nurse phone care and academic detailing of physicians. Journal of the American Board of Family Medicine. 2015;28(2):195-204.

88. Meeker D, Linder JA, Fox CR, Friedberg MW, Persell SD, Goldstein NJ, et al. Effect of Behavioral Interventions on Inappropriate Antibiotic Prescribing Among Primary Care Practices: A Randomized Clinical Trial. Jama. 2016;315(6):562-70.

89. Filippini M, Ortiz LG, Masiero G. Assessing the impact of national antibiotic campaigns in Europe. The European journal of health economics. 2013;14(4):587-99.

90. Monnet DL, Safrany N, Heine N, Price C. Comment on: A systematic review of the public's knowledge and beliefs about antibiotic resistance. The Journal of antimicrobial chemotherapy. 2016;71(8):2364-5.

91. Ashiru-Oredope D, Hopkins S. Antimicrobial resistance: moving from professional engagement to public action. The Journal of antimicrobial chemotherapy. 2015;70(11):2927-30.

92. Lambert MF, Masters GA, Brent SL. Can mass media campaigns change antimicrobial prescribing? A regional evaluation study. The Journal of antimicrobial chemotherapy. 2007;59(3):537-43.

93. Sabuncu E, David J, Bernede-Bauduin C, Pepin S, Leroy M, Boelle PY, et al. Significant reduction of antibiotic use in the community after a nationwide campaign in France, 2002-2007. PLoS Med. 2009;6(6):e1000084.

94. Chahwakilian P, Huttner B, Schlemmer B, Harbarth S. Impact of the French campaign to reduce inappropriate ambulatory antibiotic use on the prescription and consultation rates for respiratory tract infections. The Journal of antimicrobial chemotherapy. 2011;66(12):2872-9.

95. Lee MHM, Pan DST, Huang JH, Chen MI, Chong JWC, Goh EH, et al. Results from a Patient-Based Health Education Intervention in Reducing Antibiotic Use for Acute Upper Respiratory Tract Infections in the Private Sector Primary Care Setting in Singapore. Antimicrob Agents Chemother. 2017;61(5).

96. Belongia EA, Knobloch MJ, Kieke BA, Davis JP, Janette C, Besser RE. Impact of statewide program to promote appropriate antimicrobial drug use. Emerging infectious diseases. 2005;11(6):912-20.

97. Rubin MA, Bateman K, Alder S, Donnelly S, Stoddard GJ, Samore MH. A multifaceted intervention to improve antimicrobial prescribing for upper respiratory tract infections in a small rural community. Clinical infectious diseases. 2005;40(4):546-53.

98. WHO. Antimicrobial Medicines Consumption (AMC) Network. 2017. Available at URL: <http://www.euro.who.int/en/publications/abstracts/antimicrobial-medicines-consumption-amc-network.-amc-data-20112014-2017> [

99. Adriaenssens N, Coenen S, Versporten A, Muller A, Vankerckhoven V, Goossens H. European Surveillance of Antimicrobial Consumption (ESAC): quality appraisal of antibiotic use in Europe. The Journal of antimicrobial chemotherapy. 2011;66 Suppl 6:vi71-7.

100. Versporten A, Bolokhovets G, Ghazaryan L, Abilova V, Pyshnik G, Spasojevic T, et al. Antibiotic use in eastern Europe: a cross-national database study in coordination with the WHO Regional Office for Europe. The Lancet Infectious diseases. 2014;14(5):381-7.

101. ECDC. Quality indicators for antibiotic consumption in the community in Europe. Available at URL: <http://ecdc.europa.eu/en/healthtopics/antimicrobial-resistance-and-consumption/antimicrobial-consumption/esac-net-database/Pages/quality-indicators-primary-care.aspx>

102. Abilova V, Kurdi A, Godman B. Ongoing initiatives in Azerbaijan to improve the use of antibiotics; findings and implications. Expert review of anti-infective therapy. 2018;16(1):77-84.

103. Bojanic L, Markovic-Pekovic V, Skrbic R, Stojakovic N, Ethermanovic M, Bojanic J, et al. Recent Initiatives in the Republic of Srpska to Enhance Appropriate Use of Antibiotics in Ambulatory Care; Their Influence and Implications. Frontiers in pharmacology. 2018;9:442.

104. de Bie S, Kaguelidou F, Verhamme KM, De Ridder M, Picelli G, Straus SM, et al. Using Prescription Patterns in Primary Care to Derive New Quality Indicators for Childhood Community Antibiotic Prescribing. The Pediatric infectious disease journal. 2016;35(12):1317-23.

105. Robertson J, Iwamoto K, Hoxha I, Ghazaryan L, Abilova V, Cvijanovic A et al. Antimicrobial Medicines Consumption in Eastern Europe and Central Asia – an Updated Cross-National Study and Assessment of Quantitative Metrics for Policy Action. [Front Pharmacol.](https://www.ncbi.nlm.nih.gov/pubmed/30890943) 2019;9:1156.

106. Harris AM, Hicks LA, Qaseem A. Appropriate Antibiotic Use for Acute Respiratory Tract Infection in Adults: Advice for High-Value Care From the American College of Physicians and the Centers for Disease Control and Prevention. Annals of internal medicine. 2016;164(6):425-34.

107. Campbell SM, Godman B, Diogene E, Furst J, Gustafsson LL, MacBride-Stewart S, et al. Quality indicators as a tool in improving the introduction of new medicines. Basic & clinical pharmacology & toxicology. 2015;116(2):146-57.
